# Supplementary material for: Ferroptosis: An Emerging Target for Bladder Cancer Therapy
Source: MDPI journal article supplement (doi:10.3390/cimb45100517), 2023-10-10
Supplement: s1 [file s1]

**Table S1. Inducers/Inhibitors of ferroptosis in bladder cancer.**

| <b>Molecular name</b> | <b>Inducer/Inhibitor of ferroptosis</b> | <b>Target Molecular</b>    |
|-----------------------|-----------------------------------------|----------------------------|
| <b>RNA</b>            |                                         |                            |
| LncRNA RP11-89        | Inhibitor                               | miR-129-5p, PROM2          |
| circST6GALNAC6        | Inducer                                 | HSPB1 /p38 MAPK pathway    |
| miR-217               | Inhibitor                               | exosomes                   |
| Fin56                 | Inducer                                 | GPX4                       |
| <b>Gene</b>           |                                         |                            |
| GCLM                  | Inhibitor                               | Anti-PD-L1 antibodies      |
| WTAP                  | Inhibitor                               | m6A, NRF2                  |
| EMP1                  | Inhibitor                               | PPARG, pFAK(Y397), SLC7A11 |
| HSPA5                 | Inhibitor                               | P53/SLC7A11/GPX4 pathway   |
| SND1                  | Inducer                                 | GPX4                       |
| PHGDH                 | Inducer                                 | PCBP2, SLC7A11             |
| ALOX15B               | Inducer                                 | p53, ALOX15B               |
| GSTZ1                 | Inducer                                 | HMGB1/GPX4 signaling       |
| FLRT2                 | Inducer                                 | ACSL4                      |
| <b>Drug</b>           |                                         |                            |
| Baicalin              | Inducer                                 | FTH1                       |
| Erianin               | Inducer                                 | NFR2                       |
| Bupivacaine           | Inducer                                 | PI3K, Akt, mTOR            |
| AA                    | Inducer                                 | GPX4, HO-1                 |
| 7j                    | Inducer                                 | GPX4                       |
| EVO                   | inducer                                 | GPX4                       |
